# Supplementary material
Source: PubMed Central journal article supplement (PMC7108132)
Supplement: figures1.pdf [file figures1.pdf]

Supplemental Data Figure 1:

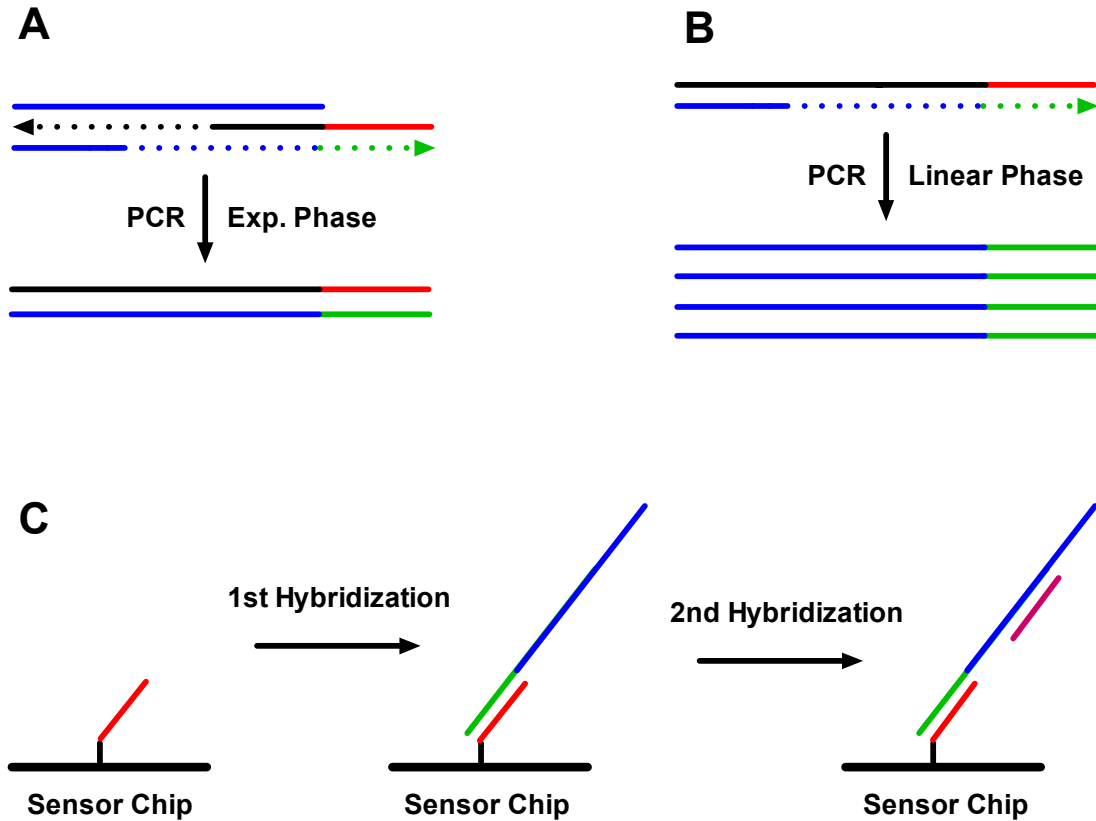

**Fig. 1: Schematic illustration of introduction of tag sequence into PCR product and detection of PCR product on BIAcore sensor chip.**

(A) Tag sequence (-, -) is introduced into double-stranded PCR product in the exponential phase when both low- (short -) and high-concentration (short -) primer are available in PCR reaction. (B) Single-stranded DNA product with tag sequence is produced during the linear phase when only high-concentration (short -) primer is available. (C) Asymmetric PCR product is injected over sensor chip surface and the single-stranded PCR product hybridizes to the immobilized oligonucleotide capture probe (-) that is complementary to the tag sequence (-). A target-specific probe (-) can be injected to further verify that the captured PCR product is the target expected.
