# Supplementary material
Source: PubMed Central journal article supplement (PMC7108132)
Supplement: figures2.pdf [file figures2.pdf]

Supplemental Data Figure 2:

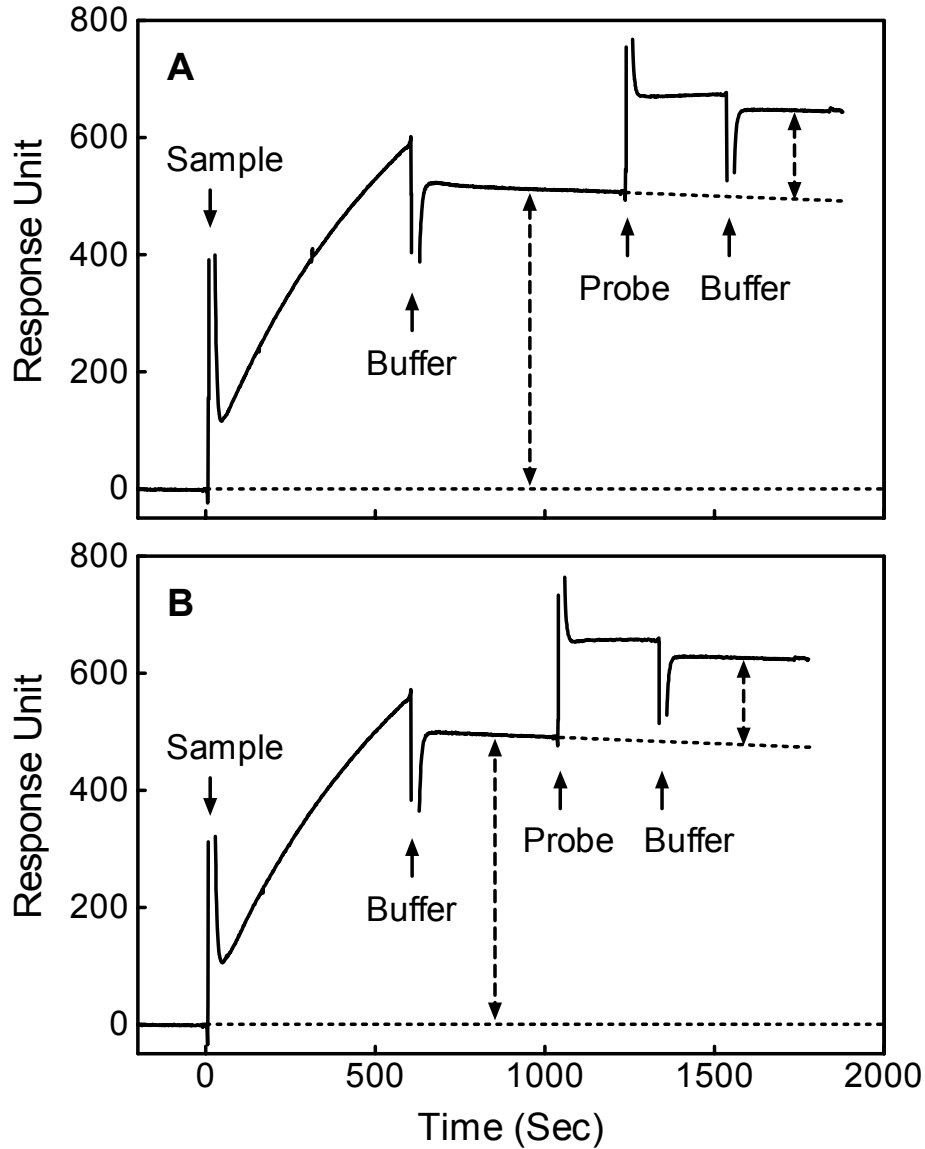

**Fig. 2: Detection of different targets using a common sensor chip.**

Asymmetric PCR product of (A) hTERT or (B) p53 gene was injected over and captured on sensor chip surface as demonstrated by the increase in response unit. After a period of running buffer flow, probe that is complementary to the target gene was injected and the additional increase in response unit indicates the captured PCR product is the target expected. Measurements used the same immobilized oligonucleotide probe and chip.
